# Supplementary material for: No Effect of High-Dose Vitamin D Supplementation on Glycemic Status or Cardiovascular Risk Factors in Subjects With Prediabetes
Source: Oxford University Press journal article supplement (doi:10.2337/dc14-0218), 2014-06-20
Supplement: dc140218supplementarydata.pdf [file dc140218supplementarydata.pdf]

## SUPPLEMENTARY DATA

### Serum 25(OH)D assay

Serum levels of 25(OH)D were measured by LC-MS/MS. Liquid-liquid extraction of serum (80 µl) was performed as previously reported (1) on a Tecan Freedom Evo liquid handler (Männedorf, Switzerland). 25(OH) D<sub>2</sub> and D<sub>3</sub> were quantified using a Waters Acquity™ I-class UPLC system with an autosampler and a binary solvent delivery system (Waters, Milford, MA) interfaced to Waters Xevo TQ-S benchtop tandem quadrupole mass spectrometer (Waters, Manchester, UK). The chromatography was performed on a 2.1 x 100 mm Waters Acquity HSS PFP Column, 100Å, 1.8 µm maintained at 50 °C. The column was eluted isocratically with 0.1% aqueous formic acid:methanol (23:77) at 0.45 mL. Sample injection volume was 3 µl and the injection interval was 2.7 min. The mass spectrometer was operated in positive electrospray ion mode (ESI+) and spray voltage was 1.3 kV; The system was controlled by MassLynx™ version 4.1 software; desolvation gas temperature, 500 °C; source temperature 150 °C; desolvation gas flow 1000 L/h; cone gas flow, 150 L/h; collision gas pressure 3.5 x 10<sup>-3</sup> mBar (argon); ion energies, 0.8 V for both quadrupoles. For quantitative analysis of 25(OH) D<sub>3</sub> and D<sub>2</sub>, MRM transition *m/z* 383.3→257.2, 383.3→365.25 (QC) and 395.3→269.1, 395.3→377.2 (QC) were used respectively. For the internal standard (25(OH) D<sub>3</sub>-d<sub>6</sub>) MRM transition *m/z* 389.3→263.2 and 389.3→371.25 were used. The linear dynamic range (*r*<sup>2</sup>>0.99) for 25(OH) D<sub>2</sub> and D<sub>3</sub> was from 4 nM to 280 nM and the limit of quantification (LOQ) was < 4 nmol/L for both. Between-day coefficient of variation (% CV) for both was < 9 % at three different days (28 serum samples, MassCheck® level 1 and 2 for 25(OH) D<sub>2</sub> and D<sub>3</sub> serum controls from Chromsystems, (Chromsystems Instruments & Chemicals GmbH, Munchen, Germany) and Labquality vitamins 3/2012 and 4/2012 (Labquality eqas, Helsinki, Finland). Intraday precision values were calculated by assaying two serum samples 6 times on the same day. The CV for both was <2% at 34.3 and 58.6 nM. Accuracy for 25(OH) D<sub>3</sub> was 104.6 % (std 3.6) determined as a percentage of the mean concentration of MassCheck® level 1 and 2 and Labquality vitamins 3/2012 and 4/2012 assayed at three different days.

### Reference.

1. Maunsell Z, Wright DJ, Rainbow SJ. Routine isotope-dilution liquid chromatography-tandem mass spectrometry assay for simultaneous measurement of the 25-hydroxy metabolites of vitamins D<sub>2</sub> and D<sub>3</sub>. Clin Chem 2005 51:1683-90.

# SUPPLEMENTARY DATA

**Supplementary Table 1.** Baseline values and change from baseline after 12 months (12 months value minus baseline value) in the vitamin D and the placebo groups in subjects with vitamin D levels at baseline < 50 mmol/L, and difference in change between the two groups (change in vitamin D group minus change in placebo group) adjusted for baseline level.

|                                         | Baseline values          |                        | Change from baseline after 12 month |                        | Difference in change between the vitamin D and placebo groups, adjusted for baseline level (mean (2.5 <sup>th</sup> , 97.5 <sup>th</sup> percentiles)) |
|-----------------------------------------|--------------------------|------------------------|-------------------------------------|------------------------|--------------------------------------------------------------------------------------------------------------------------------------------------------|
|                                         | Vitamin D group (n = 87) | Placebo group (n = 83) | Vitamin D group (n = 80)            | Placebo group (n = 74) |                                                                                                                                                        |
| Males, n (%) males                      | 61 (70.1)                | 53 (63.9)              |                                     |                        |                                                                                                                                                        |
| Age (years)                             | 60.5 ± 8.3               | 59.4 ± 10.1            |                                     |                        |                                                                                                                                                        |
| Body mass index (kg/m <sup>2</sup> )    | 30.8 ± 4.6               | 30.5 ± 3.6             | -0.0 ± 1.1                          | -0.3 ± 1.2             | 0.2 (-0.1, 0.6)                                                                                                                                        |
| Systolic blood pressure (mmHg) ‡        | 133.5 ± 15.1             | 136.0 ± 15.3           | -2.5 ± 13.2                         | -3.0 ± 13.7            | -0.5 (-4.4, 3.5)                                                                                                                                       |
| Diastolic blood pressure (mmHg) ‡       | 83.8 ± 12.0              | 84.3 ± 9.4             | -4.5 ± 10.2                         | -4.1 ± 10.7            | -0.7 (-3.5, 2.0)                                                                                                                                       |
| Oral glucose tolerance test             |                          |                        |                                     |                        |                                                                                                                                                        |
| Fasting serum glucose (mmol/L)          | 6.20 ± 0.49              | 6.01 ± 0.43            | -0.04 ± 0.56                        | 0.05 ± 0.63            | -0.07 (-0.25, 0.12)                                                                                                                                    |
| 2-h serum glucose (mmol/L)              | 7.45 ± 2.05              | 7.33 ± 1.88            | 0.74 ± 2.88                         | 1.06 ± 2.43            | -0.29 (-1.10, 0.52)                                                                                                                                    |
| Fasting serum insulin (pmol/L)          | 106 (95, 118)            | 105 (89, 121)          | 11 (0, 22)                          | 17 (4, 31)             | -4 (-20, 11)                                                                                                                                           |
| 2-h serum insulin (pmol/L)              | 626 (514, 737)           | 643 (544, 743)         | 124 (-21, 269)                      | 151 (32, 270)          | -34 (-220, 152)                                                                                                                                        |
| Fasting serum C-peptid (pmol/L)         | 1167 ± 352               | 1136 ± 380             | 25 ± 254                            | 47 ± 280               | -13 (-95, 69)                                                                                                                                          |
| HbA <sub>1c</sub> (%)                   | 6.03 ± 0.27              | 6.02 ± 0.38            | 0.05 ± 0.30                         | 0.12 ± 0.32            | -0.07 (-0.17, 0.03)                                                                                                                                    |
| HbA <sub>1c</sub> (mmol/mol)            | 42.5 ± 2.9               | 42.3 ± 4.1             | 0.5 ± 3.2                           | 1.3 ± 3.5              | -0.7 (-1.8, 0.3)                                                                                                                                       |
| HOMA IR                                 | 4.91 (4.35-5.47)         | 4.79 (4.00-5.58)       | 0.58 (-0.03-1.18)                   | 0.87 (0.09-1.64)       | -0.17 (-1.04, 0.71)                                                                                                                                    |
| QUICKI                                  | 0.32 (0.31-0.32)         | 0.32 (0.31-0.32)       | -0.00 (-0.01-0.00)                  | -0.01 (-0.01--0.00)    | 0.00 (-0.00, 0.01)                                                                                                                                     |
| Serum 25(OH)D (nmol/L)                  | 39.9 ± 7.8               | 39.4 ± 6.8             | 51.8 ± 22.4                         | 6.6 ± 10.5             | 45.2 (39.7, 50.8) *                                                                                                                                    |
| Serum calcium (mmol/L)                  | 2.30 ± 0.07              | 2.30 ± 0.08            | -0.03 ± 0.08                        | -0.04 ± 0.07           | 0.02 (-0.00, 0.04)                                                                                                                                     |
| Serum parathyroid hormone (pmol/L)      | 6.0 (5.6-6.6)            | 6.6 (6.0-7.3)          | -0.3 (-0.7-0.1)                     | 0.2 (-0.2-0.6)         | -0.7 (-1.2, -1.2)†                                                                                                                                     |
| Serum creatinine (μmol/L)               | 68.9 ± 13.9              | 69.6 ± 12.5            | 1.2 ± 6.1                           | 1.2 ± 6.4              | -0.1 (-2.2, 1.9)                                                                                                                                       |
| Serum hs-CRP (mg/L)                     | 3.44 ± 5.31              | 4.56 ± 13.89           | -0.70 ± 5.36                        | -0.15 ± 5.42           | -0.53 (-1.71, 0.65)                                                                                                                                    |
| Serum total cholesterol (mmol/L) §      | 5.49 ± 1.10              | 5.58 ± 1.08            | -0.13 ± 0.84                        | -0.11 ± 0.82           | -0.05 (-0.27, 0.17)                                                                                                                                    |
| Serum LDL cholesterol (mmol/L) §        | 3.55 ± 1.00              | 3.54 ± 0.94            | -0.12 ± 0.76                        | 0.00 ± 0.70            | -0.12 (-0.32, 0.08)                                                                                                                                    |
| Serum HDL cholesterol (mmol/L) §        | 1.27 ± 0.26              | 1.30 ± 0.37            | -0.06 ± 0.22                        | -0.03 ± 0.20           | -0.04 (-0.11, 0.02)                                                                                                                                    |
| Ratio total cholesterol/HDL cholesterol | 4.5 ± 1.4                | 4.7 ± 1.6              | 0.3 ± 2.0                           | -0.1 ± 0.9             | 0.3 (-0.1, 0.8)                                                                                                                                        |
| Triglycerides (mmol/L) §                | 1.71 (1.50-1.93)         | 1.87 (1.57-2.17)       | 0.07 (-0.11-0.25)                   | -0.25 (-0.47--0.03)    | 0.23 (-0.02, 0.49)                                                                                                                                     |
| Apolipoprotein A1 (mmol/L) §            | 1.45 ± 0.20              | 1.51 ± 0.43            | -0.10 ± 0.17                        | -0.13 ± 0.43           | -0.05 (-0.12, 0.02)                                                                                                                                    |
| Apolipoprotein B (mmol/L) §             | 1.05 ± 0.25              | 1.05 ± 0.25            | -0.04 ± 0.20                        | -0.05 ± 0.17           | 0.01 (-0.04, 0.06)                                                                                                                                     |

## SUPPLEMENTARY DATA

\*  $P < 0.001$ . †  $P < 0.05$ ; general linear regression models adjusting for baseline value. ‡ 9 subjects with changes in antihypertensive medication during the 12 months were excluded from the analyses of changes in blood pressure and heart rate. § 8 subjects with changes in statin medication during the 12 months were excluded from the analyses of changes in lipids. || A positive value means there was an increase in the vitamin D group versus the placebo group.

Abbreviations: HbA<sub>1c</sub>, glycated hemoglobin; HOMA IR, homeostatis model assessment; QUICKI, quantitative insulin sensitivity check index; 25(OH)D, 25-hydroxyvitamin D; LDL, low density lipoprotein; HDL, high density lipoprotein; hs-CRP, high-sensitivity C-reactive protein

**Supplementary Table 2.** Baseline values and change from baseline after 12 months (12 months value minus baseline value) in the vitamin D and the placebo groups, and difference in change between the two groups (change in vitamin D group minus change in placebo group) adjusted for baseline level. Included are subjects with baseline levels of 25(OH)D < 50 mmol/L and at 1 year 25(OH)D < 50 in the placebo group and 25(OH)D > 75 mmol/L in the intervention group.

|                                      | Baseline values          |                        | Change from baseline after 12 month |                        | Difference in change between the vitamin D and placebo groups, adjusted for baseline level (mean (2.5 <sup>th</sup> , 97.5 <sup>th</sup> percentiles)) |
|--------------------------------------|--------------------------|------------------------|-------------------------------------|------------------------|--------------------------------------------------------------------------------------------------------------------------------------------------------|
|                                      | Vitamin D group (n = 62) | Placebo group (n = 51) | Vitamin D group (n = 62)            | Placebo group (n = 51) |                                                                                                                                                        |
| Males, n (%) males                   | 43 (69.4)                | 35 (68.6)              |                                     |                        |                                                                                                                                                        |
| Age (years)                          | 60.1 ± 8.5               | 60.0 ± 10.4            |                                     |                        |                                                                                                                                                        |
| Body mass index (kg/m <sup>2</sup> ) | 30.2 ± 4.6               | 30.1 ± 3.9             | 0.0 ± 0.9                           | -0.3 ± 1.1             | 0.3 (-0.0, 0.7)                                                                                                                                        |
| Systolic blood pressure (mmHg) ‡     | 133.9 ± 15.2             | 137.1 ± 15.2           | -2.0 ± 13.3                         | -4.3 ± 12.7            | 1.4 (-3.4, 6.3)                                                                                                                                        |
| Diastolic blood pressure (mmHg) ‡    | 83.9 ± 12.0              | 85.4 ± 9.1             | -3.3 ± 9.5                          | -4.3 ± 9.7             | -0.2 (-3.3, 3.0)                                                                                                                                       |
| Oral glucose tolerance test          |                          |                        |                                     |                        |                                                                                                                                                        |
| Fasting serum glucose (mmol/L)       | 6.19 ± 0.52              | 6.13 ± 0.40            | -0.05 ± 0.54                        | 0.10 ± 0.68            | 0.11 (-0.36, 0.09)                                                                                                                                     |
| 2-h serum glucose (mmol/L)           | 7.50 ± 2.14              | 7.14 ± 1.99            | 7.95 ± 2.56                         | 7.99 ± 2.71            | 0.46 (-1.13, 0.72)                                                                                                                                     |
| Fasting serum insulin (pmol/L)       | 105 (89-120)             | 101 (78-123)           | 11 (-1-23)                          | 15 (-3-34)             | -3 (-21, 16)                                                                                                                                           |
| 2-h serum insulin (pmol/L)           | 641 (493-788)            | 641 (493-788)          | 47 (-65-158)                        | 137 (-11-284)          | -89 (-268, 90)                                                                                                                                         |
| Fasting serum C-peptid (pmol/L)      | 1149 ± 376               | 1104 ± 384             | 17 ± 224                            | 48 ± 310               | -21 (-117, 76)                                                                                                                                         |
| HbA <sub>1c</sub> (%)                | 6.02 ± 0.26              | 6.02 ± 0.41            | 0.07 ± 0.30                         | 0.12 ± 0.35            | -0.05 (-0.17, 0.07)                                                                                                                                    |
| HOMA IR                              | 4.82 (4.10-5.55)         | 4.64 (3.48-5.80)       | 0.57 (-0.08-1.21)                   | 0.84 (-0.22-1.90)      | -.02 (-1.25, 0.85)                                                                                                                                     |

# SUPPLEMENTARY DATA

|                                         |                  |                  |                    |                     |                     |
|-----------------------------------------|------------------|------------------|--------------------|---------------------|---------------------|
| QUICKI                                  | 0.32 (0.31-0.33) | 0.32 (0.31-0.33) | -0.00 (-0.01-0.00) | -0.01 (-0.01--0.00) | 0.00 (-0.00, 0.01)  |
| 25(OH)D levels (nmol/L)                 | 40.7 ± 7.0       | 38.4 ± 7.5       | 57.9 ± 21.3        | 2.2 ± 8.1           | 57.7 (51.8, 63.5)*  |
| Calcium (mmol/L)                        | 2.31 ± 0.07      | 2.30 ± 0.08      | -0.03 ± 0.08       | -0.05 ± 0.07        | 0.02 (-0.00, 0.05)  |
| PTH (pmol/L)                            | 6.0 (5.4-6.7)    | 6.4 (5.6-7.2)    | -0.4 (-0.8-0.0)    | 0.2 (-0.3-0.7)      | -0.7 (-1.2, -0.2)†  |
| Creatinine (μmol/L)                     | 69.2 ± 14.3      | 69.4 ± 11.4      | 1.3 ± 6.5          | 2.5 ± 6.4           | -1.2 (-3.6, 1.3)    |
| Serum hs-CRP (mg/L)                     | 3.74 ± 6.04      | 2.94 ± 3.86      | -1.19 ± 5.54       | -0.03 ± 5.58        | -0.52 (-1.89, 0.85) |
| Cholesterol (mmol/L) §                  | 5.45 ± 1.09      | 5.61 ± 1.12      | -0.02 ± 0.71       | -0.14 ± 0.70        | 0.08 (-0.17, 0.34)  |
| LDL cholesterol (mmol/L) §              | 3.52 ± 1.01      | 3.53 ± 1.03      | -0.04 ± 0.63       | -0.02 ± 0.58        | -0.01 (-0.23, 0.21) |
| HDL cholesterol (mmol/L) §              | 1.27 ± 0.28      | 1.34 ± 0.40      | -0.03 ± 0.17       | -0.02 ± 0.20        | -0.02 (-0.09, 0.05) |
| Ratio total cholesterol/HDL cholesterol | 4.5 ± 1.4        | 4.1 ± 1.6        | 0.1 ± 1.0          | -0.1 ± 0.9          | 0.2 (-0.2, 0.5)     |
| Triglycerides (mmol/L) §                | 1.68 (1.44-1.92) | 1.83 (1.45-2.22) | 0.06 (-0.16-0.28)  | -0.27 (-0.56-0.01)  | 0.28 (-0.03, 0.59)  |
| Apolipoprotein A1 (mmol/L) §            | 1.45 ± 0.21      | 1.58 ± 0.51      | -0.10 ± 0.14       | -0.15 ± 0.50        | -0.04 (-0.12, 0.04) |
| Apolipoprotein B (mmol/L) §             | 1.04 ± 0.25      | 1.04 ± 0.27      | -0.04 ± 0.16       | -0.05 ± 0.15        | 0.03 (-0.04, 0.08)  |

\*  $P < 0.001$ . †  $P < 0.05$ ; general linear regression models adjusting for baseline value. ‡ 8 subjects with changes in antihypertensive medication during the 12 months were excluded from the analyses of changes in blood pressure and heart rate. §7 subjects with changes in statin medication during the 12 months were excluded from the analyses of changes in lipids. || A positive value means there was an increase in the vitamin D group versus the placebo group.

Abbreviations: HbA<sub>1c</sub>, glycated hemoglobin; HOMA IR, homeostatis model assessment; QUICKI, quantitative insulin sensitivity check index; 25(OH)D, 25-hydroxyvitamin D; LDL, low density lipoprotein; HDL, high density lipoprotein; hs-CRP, high-sensitivity C-reactive protein

# SUPPLEMENTARY DATA

**Supplementary Table 3.** Systolic and diastolic blood pressure at baseline in the vitamin D and placebo groups in subjects not using blood pressure medication, subjects on stable blood pressure medication and in subjects with hypertension not using or on stable blood pressure medication.

|                                            | Subjects not using blood pressure medication |               | Subjects on stable blood pressure medication |               | Subjects with hypertension* not using or on stable blood pressure medication |               |
|--------------------------------------------|----------------------------------------------|---------------|----------------------------------------------|---------------|------------------------------------------------------------------------------|---------------|
|                                            | Vitamin D group                              | Placebo group | Vitamin D group                              | Placebo group | Vitamin D group                                                              | Placebo group |
| Subjects regardless of baseline 25(OH)D    | 139                                          | 139           | 108                                          | 107           | 114                                                                          | 101           |
| Systolic blood pressure (mmHg)             | 134.2 ± 17.2                                 | 133.2 ± 17.0  | 136.1 ± 15.7                                 | 138.9 ± 16.2  | 148.3 ± 12.5                                                                 | 150.8 ± 12.2  |
| Diastolic blood pressure (mmHg)            | 82.9 ± 9.9                                   | 82.8 ± 9.3    | 84.6 ± 11.6                                  | 83.0 ± 9.9    | 90.4 ± 10.0                                                                  | 89.0 ± 9.4    |
|                                            |                                              |               |                                              |               |                                                                              |               |
| Subjects with baseline 25(OH)D < 50 nmol/L | 46                                           | 45            | 36                                           | 33            | 27                                                                           | 29            |
| Systolic blood pressure (mmHg)             | 131.4 ± 13.2                                 | 134.8 ± 15.2  | 137.4 ± 16.2                                 | 137.5 ± 16.6  | 145.8 ± 11.5                                                                 | 151.3 ± 12.7  |
| Diastolic blood pressure (mmHg)            | 82.6 ± 10.2                                  | 84.4 ± 8.0    | 85.8 ± 13.8                                  | 84.5 ± 11.5   | 92.3 ± 11.1                                                                  | 91.8 ± 10.3   |

\*Systolic blood pressure ≥ 140.0 mmHg and/or diastolic blood pressure ≥ 90.0 mmHg.

Abbreviations: 25(OH)D, 25-hydroxyvitamin D

## SUPPLEMENTARY DATA

**Supplementary Table 4.** Difference in change in blood pressure adjusted for baseline level between the vitamin D group and placebo group in relation to blood pressure medication and blood pressure status.

|                                             | Difference in change between the vitamin D and placebo groups, adjusted for baseline level (mean (2.5 <sup>th</sup> , 97.5 <sup>th</sup> percentile)) |                                  |                                                                  |
|---------------------------------------------|-------------------------------------------------------------------------------------------------------------------------------------------------------|----------------------------------|------------------------------------------------------------------|
|                                             | Subjects not using BP medication                                                                                                                      | Subjects on stable BP medication | Subjects with hypertension* not using or on stable BP medication |
| Subjects regardless of baseline 25(OH)D (n) | 123/125                                                                                                                                               | 107/107                          | 112/99                                                           |
| Systolic blood pressure (mmHg)              | 0.8 (-2.1, 3.7)                                                                                                                                       | -2.1 (-5.7, 1.6)                 | 2.4 (-1.5, 6.4)                                                  |
| Diastolic blood pressure (mmHg)             | 0.58 (-1.3, 2.5)                                                                                                                                      | -0.71 (-2.8, 1.4)                | 1.66 (-0.8, 4.1)                                                 |
|                                             |                                                                                                                                                       |                                  |                                                                  |
| Subjects with baseline 25(OH)D < 50 nmol/L  | 38/36                                                                                                                                                 | 36/33                            | 36/27                                                            |
| Systolic blood pressure (mmHg)              | 1.0 (-4.3, 6.4)                                                                                                                                       | -2.4 (-8.5, 3.7)                 | 3.8 (-3.3, 10.8)                                                 |
| Diastolic blood pressure (mmHg)             | 0.7 (-3.4, 4.7)                                                                                                                                       | -1.55 (-5.3, 2.2)                | 1.48 (-3.1, 6.1)                                                 |

\* General linear regression models adjusting for baseline value. Systolic blood pressure  $\geq 140.0$  mmHg and/or diastolic blood pressure  $\geq 90.0$  mmHg. A positive value means there was an increase in the vitamin D group versus the placebo group.

Abbreviations: 25(OH)D, 25-hydroxyvitamin D

# SUPPLEMENTARY DATA

**Supplementary Table 5.** Lipid values at baseline in the vitamin D and placebo groups in subjects not using blood pressure medication, subjects on stable blood pressure medication and in subjects with hypertension not using or on stable blood pressure medication.

|                                                | Subjects not using lipid medication |                   | Subjects on stable lipid medication |                   | Subjects not using or on stable lipid medication, subjects with baseline serum TC > 7.8 mmol/L and/or baseline serum LDL > 4.9 mmol/L |                   |
|------------------------------------------------|-------------------------------------|-------------------|-------------------------------------|-------------------|---------------------------------------------------------------------------------------------------------------------------------------|-------------------|
|                                                | Vitamin D group                     | Placebo group     | Vitamin D group                     | Placebo group     | Vitamin D group                                                                                                                       | Placebo group     |
| Subjects regardless of baseline 25(OH)D        | 186                                 | 193               | 62                                  | 54                | 27                                                                                                                                    | 22                |
| Serum total cholesterol (mmol/L)               | 5.98 ± 0.96                         | 5.98 ± 0.99       | 5.00 ± 0.92                         | 5.24 ± 1.08       | 7.63 ± 0.59                                                                                                                           | 7.65 ± 0.68       |
| Serum LDL cholesterol (mmol/L)                 | 3.98 ± 0.84                         | 3.91 ± 0.87       | 3.04 ± 0.77                         | 3.25 ± 0.86       | 5.43 ± 0.36                                                                                                                           | 5.42 ± 0.37       |
| Serum HDL cholesterol (mmol/L)                 | 1.34 ± 0.33                         | 1.37 ± 0.35       | 1.39 ± 0.36                         | 1.39 ± 0.44       | 1.39 ± 0.31                                                                                                                           | 1.46 ± 0.28       |
| Ratio cholesterol/HDL cholesterol              | 4.7 ± 1.3                           | 4.6 ± 1.3         | 3.79 ± 1.09                         | 4.06 ± 1.47       | 5.83 ± 1.20                                                                                                                           | 5.37 ± 0.91       |
| Serum triglycerides (mmol/L)                   | 1.63 (1.51, 1.75)                   | 1.64 (1.48, 1.79) | 1.63 (1.40, 1.85)                   | 1.63 (1.39, 1.88) | 1.98 (1.66, 2.29)                                                                                                                     | 1.60 (1.31, 1.89) |
| Serum apolipoprotein A1 (mmol/L)               | 1.52 ± 0.25                         | 1.53 ± 0.32       | 1.57 ± 0.25                         | 1.56 ± 0.33       | 1.57 ± 0.24                                                                                                                           | 1.60 ± 0.19       |
| Serum apolipoprotein B (mmol/L)                | 1.14 ± 0.22                         | 1.13 ± 0.22       | 0.95 ± 0.23                         | 1.00 ± 0.26       | 1.50 ± 0.14                                                                                                                           | 1.50 ± 0.12       |
| Subjects with baseline 25(OH)D < 50 nmol/L (n) | 59                                  | 56                | 23                                  | 24                | 8                                                                                                                                     | 5                 |
| Serum total cholesterol (mmol/L)               | 5.81 ± 0.96                         | 5.83 ± 0.97       | 4.83 ± 1.01                         | 5.12 ± 1.18       | 7.61 ± 0.46                                                                                                                           | 7.88 ± 0.48       |
| Serum LDL cholesterol (mmol/L)                 | 3.87 ± 0.89                         | 3.75 ± 0.90       | 2.88 ± 0.81                         | 3.16 ± 0.94       | 5.51 ± 0.32                                                                                                                           | 5.70 ± 0.29       |
| Serum HDL cholesterol (mmol/L)                 | 1.27 ± 0.27                         | 1.27 ± 0.37       | 1.27 ± 0.26                         | 1.35 ± 0.39       | 1.21 ± 0.24                                                                                                                           | 1.34 ± 0.26       |
| Ratio total cholesterol/HDL cholesterol        | 4.8 ± 1.3                           | 5.0 ± 1.6         | 3.98 ± 1.32                         | 4.08 ± 1.69       | 6.48 ± 1.23                                                                                                                           | 6.05 ± 1.14       |
| Serum triglycerides (mmol/L)                   | 1.70 (1.45, 1.94)                   | 1.99 (1.57, 2.40) | 1.86 (1.36, 2.36)                   | 1.65 (1.26, 2.04) | 2.15 (1.58, 2.72)                                                                                                                     | 2.08 (1.11, 3.04) |
| Serum apolipoprotein A1 (mmol/L)               | 1.45 ± 0.21                         | 1.51 ± 0.49       | 1.48 ± 0.19                         | 1.52 ± 0.29       | 1.40 ± 0.18                                                                                                                           | 1.54 ± 0.22       |
| Serum apolipoprotein B (mmol/L)                | 1.11 ± 0.23                         | 1.10 ± 0.24       | 0.92 ± 0.24                         | 0.97 ± 0.28       | 1.52 ± 0.11                                                                                                                           | 1.56 ± 0.14       |

Abbreviations: 25(OH)D, 25-hydroxyvitamin D; LDL, low density lipoprotein; HDL, high density lipoprotein

# SUPPLEMENTARY DATA

**Supplementary Table 6.** Difference in change in lipids adjusted for baseline level between the vitamin D group and placebo group in relation to lipid medication and lipid status.

|                                                      | Difference in change between the vitamin D and placebo groups, adjusted for baseline level (mean (2.5 <sup>th</sup> , 97.5 <sup>th</sup> percentile)) |                                     |                                                                                                                                       |
|------------------------------------------------------|-------------------------------------------------------------------------------------------------------------------------------------------------------|-------------------------------------|---------------------------------------------------------------------------------------------------------------------------------------|
|                                                      | Subjects not using lipid medication                                                                                                                   | Subjects on stable lipid medication | Subjects not using or on stable lipid medication, subjects with baseline serum TC > 7.8 mmol/L and/or baseline serum LDL > 4.9 mmol/L |
| Subjects regardless of baseline 25(OH)D (n)          | 165/175                                                                                                                                               | 62/54                               | 25/22                                                                                                                                 |
| Serum total cholesterol (mmol/L)                     | -0.20 (-0.33, -0.06)*                                                                                                                                 | -0.08 (-3.73, 0.21)                 | -0.24 (-0.85, 0.38)                                                                                                                   |
| Serum LDL cholesterol (mmol/L)                       | -0.21 (-0.32, -0.09)*                                                                                                                                 | -0.11 (-0.36, 0.14)                 | -0.18 (-0.72, 0.36)                                                                                                                   |
| Serum HDL cholesterol (mmol/L)                       | -0.03 (-0.07, 0.01)                                                                                                                                   | -0.05 (-0.12, 0.02)                 | -0.08 (-0.18, 0.03)                                                                                                                   |
| Ratio total cholesterol/HDL cholesterol              |                                                                                                                                                       |                                     | 0.09 (-0.41, 0.59)                                                                                                                    |
| Serum triglycerides (mmol/L)                         | 0.10 (-0.07, 0.27)                                                                                                                                    | 0.13 (-0.08, 0.34)                  | 0.40 (0.05, 0.76) *                                                                                                                   |
| Serum apolipoprotein A1 (mmol/L)                     | -0.02 (-0.07, 0.02)                                                                                                                                   | -0.04 (-0.11, 0.02)                 | -0.05 (-0.13, 0.04)                                                                                                                   |
| Serum apolipoprotein B (mmol/L)                      | -0.03 (-0.06, -0.01)*                                                                                                                                 | 0.00 (-0.06, 0.07)                  | -0.04 (-0.16, 0.07)                                                                                                                   |
| Subjects with baseline 25(OH)D < 50 nmol/Lnmol/L (n) | 51/46                                                                                                                                                 | 23/24                               | 5/5                                                                                                                                   |
| Serum total cholesterol (mmol/L)                     | -0.14 (-0.37, 0.10)                                                                                                                                   | 0.07 (-0.39, 0.53)                  | †                                                                                                                                     |
| Serum LDL cholesterol (mmol/L)                       | -0.23 (-0.44, -0.02)*                                                                                                                                 | -0.01 (-0.42, 0.41)                 | †                                                                                                                                     |
| Serum HDL cholesterol (mmol/L)                       | -0.02 (-0.09, 0.06)                                                                                                                                   | -0.11 (-0.24, 0.02)                 | †                                                                                                                                     |
| Ratio total cholesterol/HDL cholesterol              |                                                                                                                                                       |                                     |                                                                                                                                       |
| Serum triglycerides (mmol/L)                         | 0.20 (-0.14, 0.53)                                                                                                                                    | 0.30 (-0.09, 0.69)                  | †                                                                                                                                     |
| Serum apolipoprotein A1 (mmol/L)                     | -0.03 (-1.12, 0.05)                                                                                                                                   | -0.08 (-0.19, 0.03)                 | †                                                                                                                                     |
| Serum apolipoprotein B (mmol/L)                      | -0.03 (-0.08, 0.02)                                                                                                                                   | 0.07 (-0.04, 0.19)                  | †                                                                                                                                     |

\*  $P < 0.05$ ; general linear regression models adjusting for baseline value. † Numbers too small to analyze. A positive value means there was an increase in the vitamin D group versus the placebo group.

Abbreviations: 25(OH)D, 25-hydroxyvitamin D; LDL, low density lipoprotein; HDL, high density lipoprotein



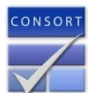

# CONSORT 2010 checklist of information to include when reporting a randomised trial\*

| Section/Topic                    | Item No | Checklist item                                                                                                                                                                              | Reported on page No |
|----------------------------------|---------|---------------------------------------------------------------------------------------------------------------------------------------------------------------------------------------------|---------------------|
| <b>Title and abstract</b>        |         |                                                                                                                                                                                             |                     |
|                                  | 1a      | Identification as a randomised trial in the title                                                                                                                                           | 1                   |
|                                  | 1b      | Structured summary of trial design, methods, results, and conclusions (for specific guidance see CONSORT for abstracts)                                                                     | 2                   |
| <b>Introduction</b>              |         |                                                                                                                                                                                             |                     |
| Background and objectives        | 2a      | Scientific background and explanation of rationale                                                                                                                                          | 3 and 4             |
|                                  | 2b      | Specific objectives or hypotheses                                                                                                                                                           | 4 and 7             |
| <b>Methods</b>                   |         |                                                                                                                                                                                             |                     |
| Trial design                     | 3a      | Description of trial design (such as parallel, factorial) including allocation ratio                                                                                                        | 4 and 5             |
|                                  | 3b      | Important changes to methods after trial commencement (such as eligibility criteria), with reasons                                                                                          | na                  |
| Participants                     | 4a      | Eligibility criteria for participants                                                                                                                                                       | 4                   |
|                                  | 4b      | Settings and locations where the data were collected                                                                                                                                        | 5                   |
| Interventions                    | 5       | The interventions for each group with sufficient details to allow replication, including how and when they were actually administered                                                       | 5 and 6             |
| Outcomes                         | 6a      | Completely defined pre-specified primary and secondary outcome measures, including how and when they were assessed                                                                          | 7 and 8             |
|                                  | 6b      | Any changes to trial outcomes after the trial commenced, with reasons                                                                                                                       | na                  |
| Sample size                      | 7a      | How sample size was determined                                                                                                                                                              | 7 and 8             |
|                                  | 7b      | When applicable, explanation of any interim analyses and stopping guidelines                                                                                                                |                     |
| Randomisation:                   |         |                                                                                                                                                                                             |                     |
| Sequence generation              | 8a      | Method used to generate the random allocation sequence                                                                                                                                      | 5                   |
|                                  | 8b      | Type of randomisation; details of any restriction (such as blocking and block size)                                                                                                         | 5                   |
| Allocation concealment mechanism | 9       | Mechanism used to implement the random allocation sequence (such as sequentially numbered containers), describing any steps taken to conceal the sequence until interventions were assigned | 5 - 6               |
| Implementation                   | 10      | Who generated the random allocation sequence, who enrolled participants, and who assigned participants to interventions                                                                     | 5 - 6               |
| Blinding                         | 11a     | If done, who was blinded after assignment to interventions (for example, participants, care providers, those assessing outcomes) and how                                                    | 5 - 6               |
|                                  | 11b     | If relevant, description of the similarity of interventions                                                                                                                                 | na                  |
| Statistical methods              | 12a     | Statistical methods used to compare groups for primary and secondary outcomes                                                                                                               | 6 - 7               |
|                                  | 12b     | Methods for additional analyses, such as subgroup analyses and adjusted analyses                                                                                                            | 7                   |

## SUPPLEMENTARY DATA

|                                                      |     |                                                                                                                                                   |           |
|------------------------------------------------------|-----|---------------------------------------------------------------------------------------------------------------------------------------------------|-----------|
| <b>Results</b>                                       |     |                                                                                                                                                   |           |
| Participant flow (a diagram is strongly recommended) | 13a | For each group, the numbers of participants who were randomly assigned, received intended treatment, and were analysed for the primary outcome    | 8         |
|                                                      | 13b | For each group, losses and exclusions after randomisation, together with reasons                                                                  | 8         |
| Recruitment                                          | 14a | Dates defining the periods of recruitment and follow-up                                                                                           | 4 and 8   |
|                                                      | 14b | Why the trial ended or was stopped                                                                                                                | na        |
| Baseline data                                        | 15  | A table showing baseline demographic and clinical characteristics for each group                                                                  | 23        |
| Numbers analysed                                     | 16  | For each group, number of participants (denominator) included in each analysis and whether the analysis was by original assigned groups           | 21 - 24   |
| Outcomes and estimation                              | 17a | For each primary and secondary outcome, results for each group, and the estimated effect size and its precision (such as 95% confidence interval) | 20 and 23 |
|                                                      | 17b | For binary outcomes, presentation of both absolute and relative effect sizes is recommended                                                       | na        |
| Ancillary analyses                                   | 18  | Results of any other analyses performed, including subgroup analyses and adjusted analyses, distinguishing pre-specified from exploratory         | 10 - 11   |
| Harms                                                | 19  | All important harms or unintended effects in each group (for specific guidance see CONSORT for harms)                                             | 8         |
| <b>Discussion</b>                                    |     |                                                                                                                                                   |           |
| Limitations                                          | 20  | Trial limitations, addressing sources of potential bias, imprecision, and, if relevant, multiplicity of analyses                                  | 13 - 14   |
| Generalisability                                     | 21  | Generalisability (external validity, applicability) of the trial findings                                                                         | 12 - 14   |
| Interpretation                                       | 22  | Interpretation consistent with results, balancing benefits and harms, and considering other relevant evidence                                     | 11 - 14   |
| <b>Other information</b>                             |     |                                                                                                                                                   |           |
| Registration                                         | 23  | Registration number and name of trial registry                                                                                                    | 8         |
| Protocol                                             | 24  | Where the full trial protocol can be accessed, if available                                                                                       |           |
| Funding                                              | 25  | Sources of funding and other support (such as supply of drugs), role of funders                                                                   | 15        |
